# Supplementary material
Source: publisher site journal article supplement (https://www.degruyterbrill.com/publication/isbn/9783110413779/downloadAsset/9783110413779_ProtokolleBeispiele.zip)
Supplement: Supplementary file 1 [file Harry Potter SP.pdf › Harry Potter SP.pdf]

III.4 Harry Potter and the Order of the Phoenix

| Sequenz<br>Zeit       | 1<br>00'00"00 - 00'38"49                     | 2<br>00'38"49 - 06'49"21                                                                                                                                           | 3<br>06'49"21 - 16'58"40                                                                                              | 4<br>16'58"40 - 24'29"53                                                                                                                                                       | 5<br>24'29"53 - 43'05"80                                                                                                                                          | 6<br>43'05"80 - 50'52"91                                                                                                                                  | 7<br>50'52"91 - 1:04'51"39                                                                                                                                     | 8<br>1:04'51"39 - 1:08'03"72                                                                          | 9<br>1:08'03"72 - 1:13'24"40                                                                                                 | 10<br>1:13'24"40 - 1:23'54"79                                                                                                                     | 11<br>1:23'54"79 - 1:34'32"26                                                                                                                      | 12<br>1:34'32"26 - 1:42'10"47                                                                                                                                                      | 13<br>1:42'10"47 - 1:52'40"69                                                                                                                                                          | 14<br>1:52'40"69 - 1:58'55"93                                                                                                                                                          | 15<br>1:58'55"93 - 2:03'09"55                                                                                                                        | 16<br>2:03'09"56 - 2:12'33"34 |
|-----------------------|----------------------------------------------|--------------------------------------------------------------------------------------------------------------------------------------------------------------------|-----------------------------------------------------------------------------------------------------------------------|--------------------------------------------------------------------------------------------------------------------------------------------------------------------------------|-------------------------------------------------------------------------------------------------------------------------------------------------------------------|-----------------------------------------------------------------------------------------------------------------------------------------------------------|----------------------------------------------------------------------------------------------------------------------------------------------------------------|-------------------------------------------------------------------------------------------------------|------------------------------------------------------------------------------------------------------------------------------|---------------------------------------------------------------------------------------------------------------------------------------------------|----------------------------------------------------------------------------------------------------------------------------------------------------|------------------------------------------------------------------------------------------------------------------------------------------------------------------------------------|----------------------------------------------------------------------------------------------------------------------------------------------------------------------------------------|----------------------------------------------------------------------------------------------------------------------------------------------------------------------------------------|------------------------------------------------------------------------------------------------------------------------------------------------------|-------------------------------|
| Handlungs-<br>verlauf | Vorspann/ Titel                              | Ausschluß von Hogwarts                                                                                                                                             | Der 'Orden des Phönix'                                                                                                | Die Verhandlung                                                                                                                                                                | Ankunft Hogwarts                                                                                                                                                  | Neue Sitten in Hogwarts                                                                                                                                   | Dumbledores Armee                                                                                                                                              | Harrys Alptraum                                                                                       | Weihnachten bei den Weasleys                                                                                                 | Zurück in Hogwarts                                                                                                                                | Revolution in Hogwarts                                                                                                                             | Rettung Sirius'                                                                                                                                                                    | Im Ministerium/Tod Sirius                                                                                                                                                              | Harry rinqt mit Voldemort                                                                                                                                                              | Epilog                                                                                                                                               | Abspann                       |
|                       | [1_1] Labels der Produktionsfirmen und Titel | [2_1] Welt d. Muggles: Harry lässt sich von seinem Cousin provozieren und zieht sogar seinen Zauberstab. Ein eigenartiges Unwetter zieht auf.                      | [3_1] Prof. Alastor 'Mad Eye' Moody bringt Harry in Sicherheit und zwar im Haus des 'Ordens des Phönix'.              | [4_1] Mr. Weasley bringt Harry in das Zaubereiministerium, wo Harrys Vergehen, in Anwesenheit von Menschen gezaubert zu haben, verhandelt wird.                                | [5_1] In Hogwarts wird Harry von seinen Mitschülern geschnitten. Sie glauben ihm die Rückkehr von Voldemort nicht, die allen viel Angst macht.                    | [6_1] Dolores kontrolliert den Alltag und den Unterricht in Hogwarts aufs Strengste und Konservativste. Die Unterricht in den 'Dark Arts' ist gestrichen. | [7_1] Harry unterrichtet heimlich eine Auswahl seiner Mitschüler in den 'Dark Arts'. Sie trainieren im geheimen Raum Hogwarts.                                 | [8_1] Wieder hat Harry einen Alptraum: Er träumt Mr. Weasley wird im Zaubereiministerium angegriffen. | [9_1] Harry, Hermione, Sirius und die Familie Weasley feiern Weihnachten zusammen im Haus des Ordens.                        | [10_1] Hagrid, ein enger Vertrauter von Harry und Lehrer auf Hogwarts, ist zurück.                                                                | [11_1] Hagrid vertraut Ron, Hermione und Harry seinen Halbbruder Grumpy an. Ein Riesenbaby, welches er tief im Wald hütet.                         | [12_1] Harry, Ron & Hermione brauchen, um schnell zu Sirius zu gelangen, das 'Flohnetzwerk'. Dazu dringen sie in das Büro von Dolores Umbridge ein.                                | [13_1] Im Zaubereiministerium findet Harry seine Prophezeiung eine Kristallkugel im Archiv der Prophezeiungen.                                                                         | [14_1] Harry verfolgt sie voller Trauer- & Rachegefühle. Er bringt sie zu Fall. Voldemort erscheint. Er fordert Harry auf, seinem Rachegefühl nachzugeben. Doch Harry widersetzt sich. | [15_1] Harry & Dumbledore besprechen die Ereignisse und den Sinn der Prophezeiung. Harry weiß nun, dass nur er oder Voldemort überleben können wird. |                               |
|                       |                                              | [2_2] Sie fliehen in einen Unterstand. Dort greifen Dementoren, die Wächter von Azkaban, Harry & seinen Cousin an. Er verteidigt sich mit Hilfe eines Zauberstabs. | [3_2] Dort trifft er auf Familie Weasley, seine Freunde, Sirius und die anderen Mitglieder des 'Ordens des Phönix'.   | [4_2] Harry wird im Prozess nicht fair behandelt. Dem Minister ist Harry ein Dorn im Auge, da er von Voldemorts Rückkehr berichtet. Dumbledore verteidigt Harry. Sie gewinnen. | [5_2] Dolores Umbridge, eine Mitarbeiterin des Ministers, kommt als Lehrerin nach Hogwarts. Sie soll Dumbledore, dem Direktor der Schule, auf die Finger schauen. | [6_2] Dumbledore zieht sich immer mehr zurück, vor allen Dingen von Harry.                                                                                | [7_2] Nachdem der Unterricht abgeschlossen ist und alle in die Weihnachtsferien gehen, bleiben Harry und Cho im geheimen Raum alleine zurück. Sie küssen sich. | [8_2] Dumbledore kann die Träume interpretieren, rettet Weasley und schickt Harry zu Severus Snape.   | [9_2] Harry berichtet Sirius im Vertrauen von seinen Ängsten über seine Entwicklung und Träume.                              | [10_2] Es kommt zu Ausbrüchen von Death Eatern (Zauberer, die sich Voldemort angeschlossen haben) aus Azkaban, die Sirius Black angehängt werden. | [11_2] Harry ist wieder im Labor bei Severus Snape. Harry wehrt sich gegen die mentalen Eingriffe Snapes und taucht in seine Unterbewusstsein ein. | [12_2] Dort werden sie von Dolores überrascht. Harry wird von ihr übel gefoltert. Sie hält ihn für einen gemeinen Verschwörer aus dem Netzwerk von Dumbledore, gegen den Minister. | [13_2] Death Eater (Zauberer im Gefolge Voldemorts) tauchen auf und fordern die Prophezeiung ein. Es beginnt ein ungleicher Kampf zwischen den Zauberschülern und den dunklen Mächten. | [14_2] Dumbledore erscheint und übernimmt den Kampf mit Voldemort. Es folgt eine gigantische Schlacht.                                                                                 | [15_2] Das Schuljahr ist zu Ende. Harry und seine Freunde verlassen Hogwarts und sie kehren in die Welt der Muggles zurück.                          |                               |
|                       |                                              | [2_3] Harry erfährt im Haus seiner Tante, dass er von Hogwarts ausgeschlossen wird, da er vor einem Muggle gezaubert hat.                                          | [3_3] In der Küche versammeln sich alle, um sich zu besprechen. Harry erfährt von einer mögl. Verschwörung gegen ihn. | [4_3] Sirius verabschiedet sich von Harry am Bhf. und schenkt ihm das Foto der Gründungsmitglieder des Ordens.                                                                 | [5_3] Harry hat wieder einen Alptraum. Er träumt auch von Voldemort.                                                                                              | [6_3] Harry und seine Freunde erhalten einen letzten Rat von Sirius Black durch das Flohnetzwerk. Er warnt vor Voldemort, die Lage wird bedrohlicher.     | [8_3] Im Labor von Severus Snape: Er soll Harry mental trainieren, so das Voldemort keinen Kontakt zu seinem Geist herstellen kann.                            |                                                                                                       | [10_3] Der geheime Unterricht von Harry geht weiter. Doch Dolores Umbridge entdeckt Dumbledores Armee. Alle werden bestraft. |                                                                                                                                                   | [11_3] Die Schüler beginnen eine Revolution in Hogwarts.                                                                                           | [12_3] Hermione überlistet Dolores, mit 'Dumbledores geheimer Waffe', die es nicht gibt. So können sie fliehen.                                                                    | [13_3] Doch dann tauchen die Mitglieder des Ordens auf, um Harry und seine Freunde im Kampf zu unterstützen. Ein fulminanter Kampf der Zauberer beginnt.                               | [14_3] Dumbledore scheint den Kampf gewonnen zu haben. Doch dann bricht Harry zusammen & der Kampf mit Voldemort beginnt im Innern von Harry.                                          |                                                                                                                                                      |                               |
|                       |                                              |                                                                                                                                                                    | [3_4] 1. Alptraum von Harry                                                                                           | [4_4] Auf dem Bahnsteig nach Hogwarts begegnet Harry Voldemort.                                                                                                                | [5_4] Im Unterricht widerspricht Harry Dolores in Sachen Voldemort und muss nachsitzen.                                                                           |                                                                                                                                                           |                                                                                                                                                                |                                                                                                       |                                                                                                                              |                                                                                                                                                   | [11_4] Inmitten der Rev. hat Harry wieder ein Vision: Voldemort hat Sirius in seiner Gewalt. Er macht sich sofort auf den Weg, etwas zu            | [12_4] Auf den Thestralen fliegen die Freunde (Dumbledores Armee) nach London, um Sirius zu retten.                                                                                | [13_4] Sirius stirbt im Kampf, seine Cousine Bellatrix Lestrange trifft ihn mit dem tödlichen Zauber. Er sirbt direkt an Harrys Seite.                                                 | [14_4] Harry setzt sich jedoch letztendlich gegen Voldemort durch und es gelingt ihm, den dunkeln Lord aus sich zu vertreiben.                                                         |                                                                                                                                                      |                               |
|                       |                                              |                                                                                                                                                                    |                                                                                                                       |                                                                                                                                                                                | [5_5] Harry fühlt sich unverstanden und allein. Er trifft Luna Lovegood bei den Thestralen. Sie versteht ihn und macht ihm Mut.                                   |                                                                                                                                                           |                                                                                                                                                                |                                                                                                       |                                                                                                                              |                                                                                                                                                   |                                                                                                                                                    |                                                                                                                                                                                    |                                                                                                                                                                                        | [14_5] Nun erscheint auch der Minister im Ministerium, sieht Voldemort & glaubt nun an dessen Rückkehr, was Dumbledore und Harry vollständig rehabilitiert.                            |                                                                                                                                                      |                               |

Legende

Identity Points

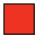

Signifikanter Identity Point

Harrys Erbe

Gut und Böse

Harrys Vision

Harrys Rache

Harrys Kampf mit Voldemort

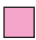

Schwacher I.P. Inhaltsanalyse

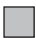

Schwacher I.P. Filmsequenzanalyse

Harry Potter  
and the Order of the Phoenix

Produktionsdaten  
2007 | UK/USA | David Yates

Gesamtdauer  
2:12'33

Box Office  
\$ 646,208,000
