# Supplementary material
Source: publisher site journal article supplement (https://www.degruyterbrill.com/publication/isbn/9783110413779/downloadAsset/9783110413779_ProtokolleBeispiele.zip)
Supplement: Supplementary file 2 [file Harry Potter VP.pdf › Harry Potter VP.pdf]

## *Harry Potter and the Order of the Phoenix*

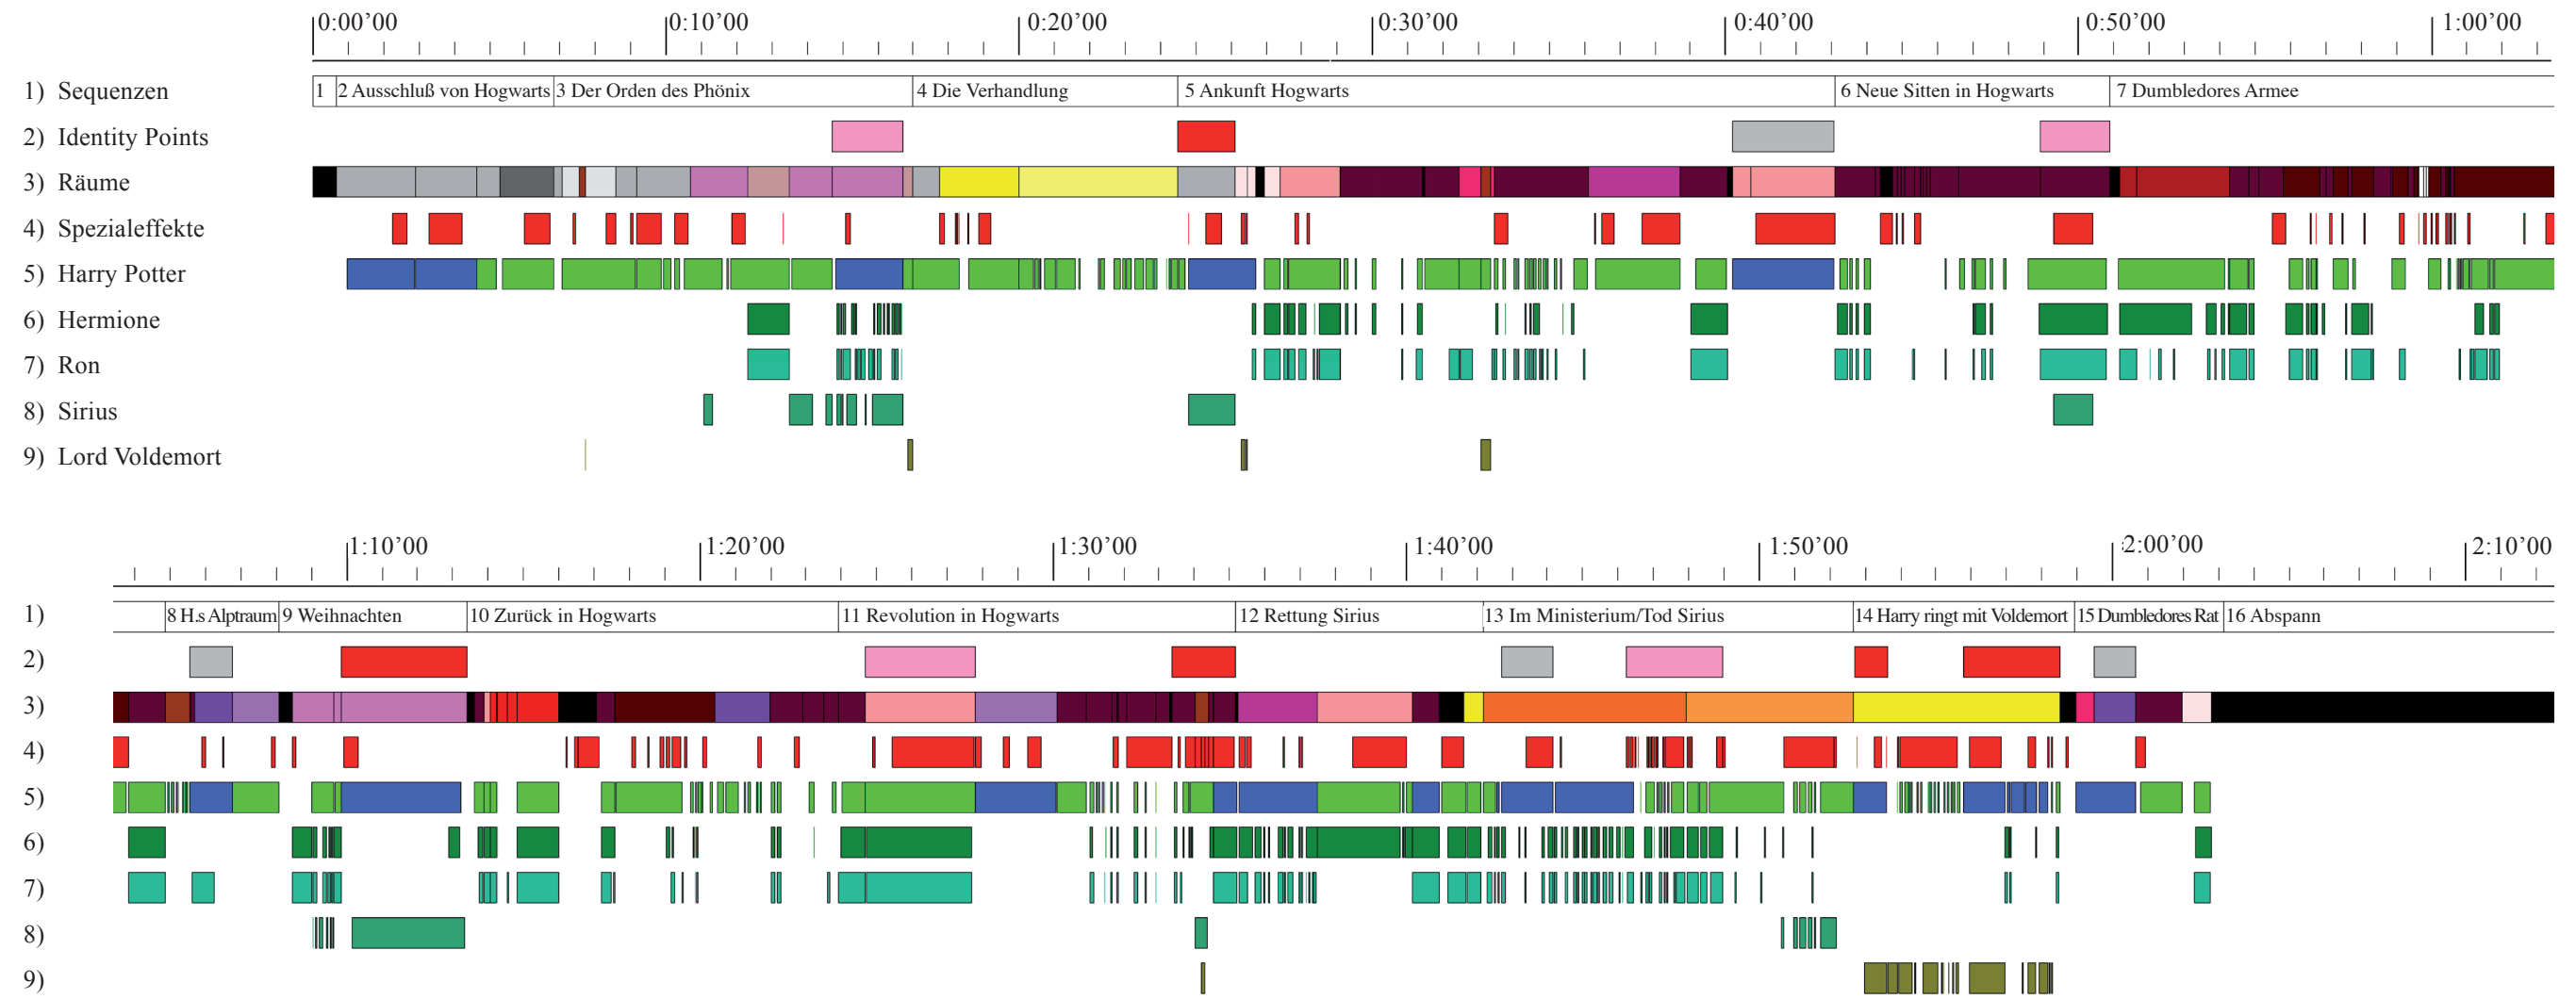

## Legende

| Räume                                                                                                                                                                                                                                                                                                                                                                                                                                                                                                                                              | Identitätsensemble                                                                                   | Identity Points                                                                                                         |
|----------------------------------------------------------------------------------------------------------------------------------------------------------------------------------------------------------------------------------------------------------------------------------------------------------------------------------------------------------------------------------------------------------------------------------------------------------------------------------------------------------------------------------------------------|------------------------------------------------------------------------------------------------------|-------------------------------------------------------------------------------------------------------------------------|
|    Welt der Muggle                                                                                                                                                                                                                                                                        |  Harry Potter   |  Signifikanter Identity Point      |
|  Träume                                                                                                                                                                                                                                                                                                                                                                                                                                                         |  Hermione       |  Harrys Erbe                       |
|   Haus des Ordens                                                                                                                                                                                                                                                                                                                                                            |  Ron            |  Gut und Böse                      |
|    Zaubereiministerium                                                                                                                                                                                                                                                                    |  Sirius         |  Harrys Vision                     |
|     Hogwarts – jenseits des Schulgebäudes                                                                                                                                                              |  Lord Voldemort |  Harrys Rache                      |
|       Hogwarts – im Schulgebäude | <b>Patchworkidentität</b>                                                                            |  Harrys Kampf mit Voldemort        |
|  Sonstige Räume                                                                                                                                                                                                                                                                                                                                                                                                                                                 |  Harry Potter   |  Schwacher I.P. Inhaltsanalyse     |
|  <b>Spezialeffekte</b>                                                                                                                                                                                                                                                                                                                                                                                                                                          |                                                                                                      |  Schwacher I.P. Filmsequenzanalyse |

*Harry Potter  
and the Order of the Phoenix*

Produktionsdaten

2007 | UK/USA | **David Yates**

Gesamtdauer

**2:12'33**

Box Office

**\$ 646,208,000**
