# Supplementary material
Source: publisher site journal article supplement (https://www.degruyterbrill.com/publication/isbn/9783110413779/downloadAsset/9783110413779_ProtokolleBeispiele.zip)
Supplement: Supplementary file 3 [file Ice Age SP.pdf › Ice Age SP.pdf]

III.3 Ice Age: The Meltdown

| Sequenz<br>Zeit       | 1<br>00'00"00 - 02'44"62                                                                                       | 2<br>02'44"62 - 14'44"58                                                                                                         | 3<br>14'44"47 - 26'03"87                                                                                                         | 4<br>26'03"87 - 37'11"98                                                                                                                               | 5<br>37'11"98 - 50'30"33                                                                                                      | 6<br>50'30"33 - 58'45"86                                               | 7<br>58'45"86 - 1:05'37"84                                                                                                    | 8<br>1:05'37"84 - 1:11'21"25                                                                                                                   | 9<br>1:11'21"25 - 1:20'08"24                                                                                                             | 1:20'08"24 - 1:26'57"00 |
|-----------------------|----------------------------------------------------------------------------------------------------------------|----------------------------------------------------------------------------------------------------------------------------------|----------------------------------------------------------------------------------------------------------------------------------|--------------------------------------------------------------------------------------------------------------------------------------------------------|-------------------------------------------------------------------------------------------------------------------------------|------------------------------------------------------------------------|-------------------------------------------------------------------------------------------------------------------------------|------------------------------------------------------------------------------------------------------------------------------------------------|------------------------------------------------------------------------------------------------------------------------------------------|-------------------------|
| Handlungs-<br>verlauf | Vorspann                                                                                                       | Campo del Sid                                                                                                                    | Ellie                                                                                                                            | Manny und Ellie                                                                                                                                        | Kindheitserinnerungen                                                                                                         | Sid der Feuergott                                                      | Das Geysirfeld                                                                                                                | Das Felsgefängnis                                                                                                                              | Die Arche                                                                                                                                | Abspann                 |
|                       | [1_1] Labels der Produktionsfirmen                                                                             | [2_1] 'This global warming is killing me!' Die Tiere genießen den Badespaß in der Eisschmelze.                                   | [3_1] Alle Tiere machen sich in einem langen Zug, auf zu der Arche am Ende des Tals.                                             | [4_1] Scrat                                                                                                                                            | [5_1] Sid & Diego lassen nicht locker und ermuntern Manny weiterhin, Ellie den Hof zu machen. Manny geht noch mal auf sie zu. | [6_1] Sid träumt/erlebt, dass er ein Feuergott sei. Keiner glaubt ihm. | [7_1] Ellie & Manny können sich anhand der Geysir-Gefahr nicht auf den Weg einigen und trennen sich.                          | [8_1] Manny versucht Ellie zu retten. Das Wasser im Felsgefängnis steigt.                                                                      | [9_1] Im Areal der Arche trifft Sid auf seine Jünger. Doch Diego sorgt dafür, dass Sid bei der Patchworkherde bleibt.                    |                         |
|                       | [1_2] Scrat = eine zuerst nicht weiter in die Handlung einbezogene Zwischenhandlung von Scrat und seiner Nuss. | [2_2] Die Nachricht von der Flutung des Tals erreicht den Wasserpark.                                                            | [3_2] Scrat                                                                                                                      | [4_2] Manny versucht Ellie zu erklären, dass sie ein Mammut ist.                                                                                       | [5_2] Ellie entdeckt ihre Vergangenheit [Backflash] und erkennt, dass sie ein Mammut ist. Sie kommen sich näher.              | [6_2] Die Geier säumen den Weg der Patchworkherde. Und singen ihr Lied | [7_2] Manny wird von einem Geysir getroffen und verliert für einen Moment das Bewusstsein.                                    | [8_2] Diego rettet Sid & die Halbbrüder Ellies aus den Fluten. Sie finden Zuflucht auf einer kleinen Insel.                                    | [9_2] Viele andere Mammuts kommen an. Ellie entscheidet sich, mit ihnen zu ziehen. Manny lässt sie gehen.                                |                         |
|                       | [1_3] Titel                                                                                                    | [2_3] Sid will mehr Respekt von seinen Freunden Diego & Manny und will vom höchsten Turm des Wasserparks springen.               | [3_3] Manny glaubt, ein Mammut gefunden zu haben, wird jedoch enttäuscht.                                                        | [4_3] Auf einem Eissee kommt es zu einem Kampf mit Unterwassertieren. Manny verhält sich 'heldenhaft' & erntet Spott von Ellie.                        | [5_3] Scrat                                                                                                                   |                                                                        | [7_3] Sid, Diego & Manny erreichen die Arche. Sie können zwischen all den anderen Tieren weder Ellie noch ihre Brüder finden. | [8_3] Manny gelingt es, Ellie zu befreien, trotz der aggressiven Meerestiere, die ihn angreifen.                                               | [9_3] Diego & Sid raten Manny, seine Ellie nicht ziehen zu lassen. Manny folgt ihrem Rat und fragt Ellie, ob sie bei ihm bleiben möchte. |                         |
|                       |                                                                                                                | [2_4] 'I'm talking about you being the last of your kind' Manny wird immer wieder damit konfrontiert, das letzte Mammut zu sein. | [3_4] Sie treffen auf Ellie und ihrer Brüder. Ellie ist ein Mammut und glaubt, sie sei ein Opossum. Gemeinsam ziehen sie weiter. | [4_4] Scrat                                                                                                                                            | [5_4] Manny bietet ihr an, die 'Spezies Mammut' zu retten, was zu Streit führt. Ellie ist verletzt und beleidigt.             |                                                                        | [7_4] Das Eis schmilzt immer mehr und führt zu starken Erschütterungen bis hin zur Arche.                                     | [8_4] Alle finden auf der kleinen Insel Zuflucht.                                                                                              | [9_4] Sid, Diego, Ellie, Manny, Eddie & Crash ziehen als Patchworkherde los.                                                             |                         |
|                       |                                                                                                                | [2_5] Diego & Manny wollen Sid daran hindern, zu springen. Dabei entdecken sie, dass das Gerücht über die Flut wahr ist.         |                                                                                                                                  | [4_5] Sid & Diego wollen Manny ermuntern, Ellie den Hof zu machen. Er schießt über das Ziel hinaus und verletzt dabei einen ihrer Brüder aus Versehen. | [5_5] Hals über Kopf starten sie ihre Wanderung in der Nacht und geraten in große Gefahr. Ellie & Manny entschuldigen sich.   |                                                                        | [7_5] Ellie und ihre Halbbrüder geraten in ein 'Felsgefängnis' aus zusammenstürzenden Felsen.                                 | [8_5] Scrat verursacht mit seiner Nuß eine Splatung der Eisfelsen. Die Eisfelsen riegelten das Tal ab, so dass die Flut nicht ablaufen konnte. | [9_5] Scrat                                                                                                                              |                         |
|                       |                                                                                                                | [2_6] Sie warnen die anderen Tiere und überzeugen sie von der Dringlichkeit der Gefahr und der Flucht.                           |                                                                                                                                  |                                                                                                                                                        |                                                                                                                               |                                                                        | [7_6] Die beiden Halbbrüder holen Manny zur Hilfe, um Ellie zu befreien.                                                      | [8_6] Durch die Spaltung fließt das Wasser ab und die Patchworkherde kann sich auf den Weg zur Arche machen.                                   | [9_6] Sid rettet Scrat das Leben.                                                                                                        |                         |

Legende

Identity Points

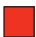

Signifikanter Identity Point

Das Opossum Ellie

Mannys Zukunft

Balance

Trennung

Patchworkherde

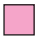

Schwacher I.P. Inhaltsanalyse

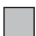

Schwacher I.P. Filmsequenzanalyse

Ice Age: The Meltdown

Produktionsdaten:

2006 | USA | Carlos Saldanha

Gesamtdauer:

1:26'52

Box Office:

\$ 460,057,537
