# Supplementary material
Source: publisher site journal article supplement (https://www.degruyterbrill.com/publication/isbn/9783110413779/downloadAsset/9783110413779_ProtokolleBeispiele.zip)
Supplement: Supplementary file 4 [file Ice Age VP.pdf › Ice Age VP.pdf]

### *Ice Age: The Meltdown*

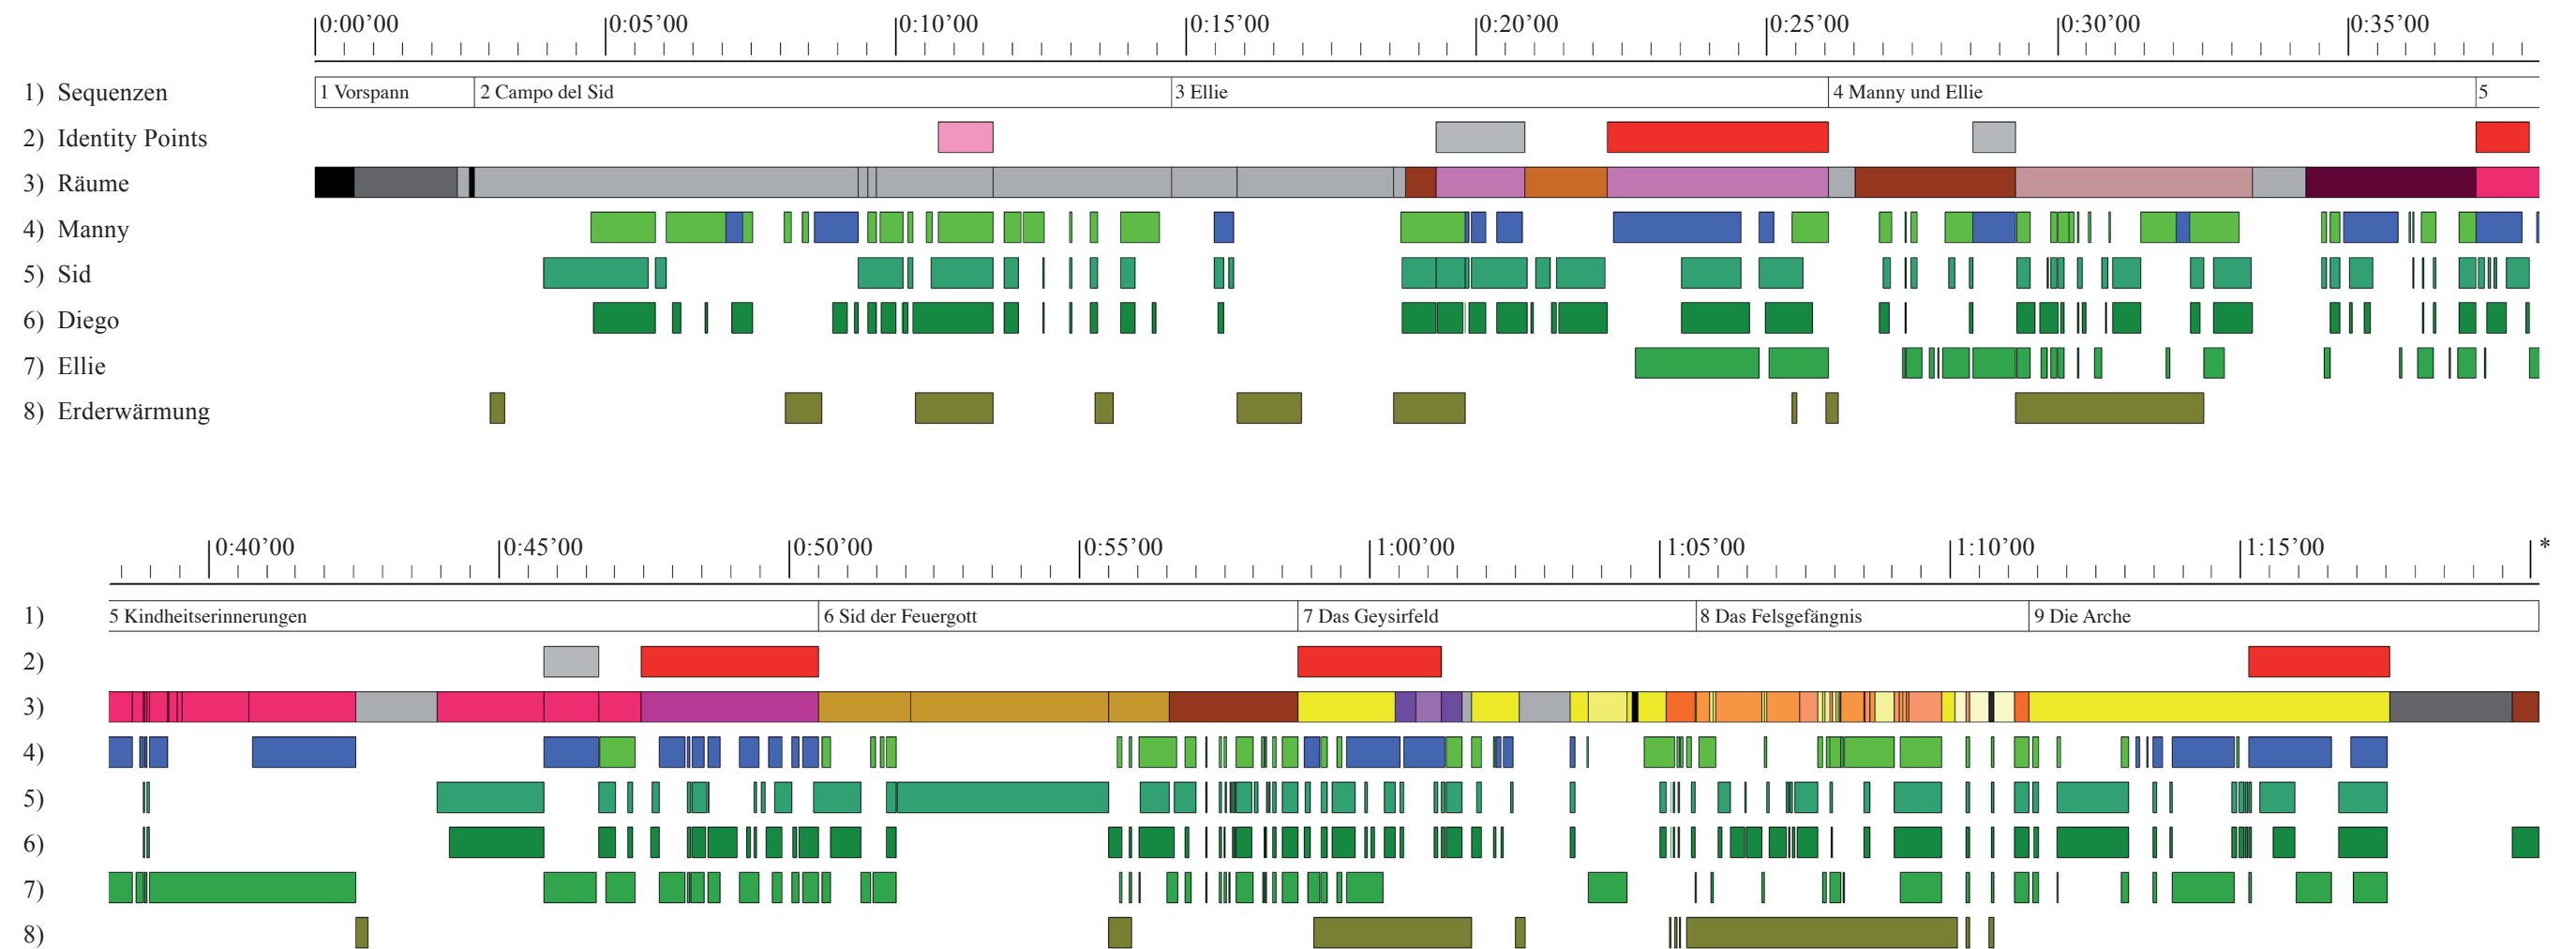

### Legende

**Räume**

- Campo del Sid
- Auf der Reise
- Stationen auf der Reise
- Am Ziel
- Sonstige Räume

**Identitätsensemble**

- Manny
- Sid
- Diego
- Ellie
- Erderwärmung

**Patchworkidentität**

- Manny

**Identity Points**

- Signifikanter Identity Point
- Das Opossum Ellie
- Mannys Zukunft
- Balance
- Trennung
- Patchworkherde
- Schwacher I.P. Inhaltsanalyse
- Schwacher I.P. Filmsequenzanalyse

### *Ice Age: The Meltdown*

Produktionsdaten:

2006 | USA | Carlos Saldanha

Gesamtdauer:

**1:26'52**

Box Office:

**\$ 460,057,537**

\* Abspann wird aus technischen Gründen nicht angezeigt, da er auf DVD nicht als Teil des Hauptfilmes angelegt ist.
